# Supplementary material
Source: publisher site journal article supplement (https://www.dovepress.com/article/263741)
Supplement: Supplementary file 1 [file get_supplementary_file.php]

**Table S1** Evidence linking *BCHE* genotypes with enzyme activity

| Population description | Major findingsa | Reference |
| --- | --- | --- |
| 90 individuals with different *BCHE* genotypes determined by sequencing. Individuals were from families with affected members as well as a random sample of unrelated, unaffected individuals. | BChE activity: NVD > K > KK. Compared to the wild-type and A alleles, the K and AK alleles were associated with a 30% reduction in BChE activity, respectively. | 1 |
| 6688 individuals whose *BCHE* genotypes were assigned by biochemical and pedigree analysis.b | BChE activity: UU > UF > UA > US > AK > AF > FS > AA > AS > SS. | 2 |
| 36 patients who had prolonged neuromuscular blockade after mivacurium or succinylcholine and were genotyped for the A variant. | The AA and A genotypes were associated with lower-than-normal enzyme activity compared to those that were negative for the A variant. | 3 |
| 44 individuals with prolonged post-succinylcholine apnea who were genotyped for A, K, F1, F2, and S1 variants. | The A variant was associated greater reduction in BChE activity than the K variant. BChE activity: AK > AKK > AA homozygotes (AAK and AAKK). AF1, AF2, and AS1 had similar or lower BChE activity compared to AA. | 4 |
| 58 patients who had previously been issued with warning cards by the Danish Cholinesterase Research Unit and were sequenced. | BChE activity: NVD > A > AK > AKK > AA homozygotes (AA, AAK, and AAKK). | 5 |
| 64 individuals genotyped for A and K variants. | The K variant was associated with a dose-dependent decrease in BChE activity: NVD > K > KK. | 6 |
| 397 healthy adults from Bucaramanga, Colombia genotyped for the K variant. | Individuals with the KK and K genotypes had a reduction of 21% and 11%, respectively, in BChE activity compared to those with no detected K variant. | 7 |

Abbreviation: NVD, no variants detected.

aRank orders are based on reported average or median BChE activity.

bDiplotypes consisting of U (wild-type), A, F, K, and S alleles were assigned when biochemical methods were used to genotype *BCHE*.

**Table S2** Published studies linking *BCHE* genotypes with duration of paralysis/apnea after succinylcholine or mivacurium

1. Population description: Patients suspected of having an abnormal response to succinylcholine

Tested variants: Assignment of U (wild-type), A, F, K, and S alleles was based on biochemical methods

Reference: 8

| Genotype (based on biochemical methods) | n | Measurement | Range (min) |
| --- | --- | --- | --- |
| UU | 41 | Duration of apnea after 1.0-1.5 mg/kg succinylcholine | 5-10 |
| UA, UF, AK | 93 | Duration of apnea after 1.0-1.5 mg/kg succinylcholine | 10-20 |
| AF, FS | 9 | Duration of apnea after 1.0-1.5 mg/kg succinylcholine | 20-35 |
| AA, AS, SS | 13 | Duration of apnea after 1.0-1.5 mg/kg succinylcholine | 35-60 |

1. Population description: Patients with prolonged neuromuscular blockade after succinylcholine or mivacurium

Tested variant: A

Reference: 3

| Genotype | n | Measurement | Mean (min) |
| --- | --- | --- | --- |
| AA | 16 | Duration of paralysis after mivacurium | 343 |
| A | 9 | Duration of paralysis after mivacurium | 316 |
| No Variants Detected | 6 | Duration of paralysis after mivacurium | 168 |
| AA | 4 | Duration of paralysis after succinylcholine | 98 |
| A | 1 | Duration of paralysis after succinylcholine | 60 |

1. Population description: Patients who had previously been issued with warning cards by the Danish Cholinesterase Research Unit

Test methods: Sequencing and pedigree analysis

Reference: 5

| Genotype | n | Measurement | Median (min) |
| --- | --- | --- | --- |
| AA | 1 | Time to reappearance of the first response to train-of-four after 0.03 mg/kg mivacurium | 26 |
| AAK | 3 | Time to reappearance of the first response to train-of-four after 0.03 mg/kg mivacurium | 30.3 |
| AAKK | 4 | Time to reappearance of the first response to train-of-four after 0.03 mg/kg mivacurium | 50.2 |
| No Variants Detected | 15 | Time to train-of-four ratio of 0.70 after 0.2 mg/kg mivacurium | 26.6 |
| A | 2 | Time to train-of-four ratio of 0.70 after 0.2 mg/kg mivacurium | 32.0 |
| K | 6 | Time to train-of-four ratio of 0.70 after 0.2 mg/kg mivacurium | 34.5 |
| KK | 3 | Time to train-of-four ratio of 0.70 after 0.2 mg/kg mivacurium | 37.2 |
| AK | 14 | Time to train-of-four ratio of 0.70 after 0.2 mg/kg mivacurium | 42.7 |
| AKK | 2 | Time to train-of-four ratio of 0.70 after 0.2 mg/kg mivacurium | 59.0 |

1. Population description: Patients with clinically prolonged neuromuscular blockade after succinylcholine

Test method: Sequencing

Reference: 9

| Genotype | n | Measurement | min |
| --- | --- | --- | --- |
| AAKK | 2 | Relaxation time after 1.5 mg/kg succinylcholine | 150, 300 |
| AAK | 1 | Relaxation time after 1.2 mg/kg succinylcholine | 120 |
| No Variants Detected | 2 | Relaxation time after 1.1 mg/kg succinylcholine | 14, 45 |
| AA | 1 | Relaxation time after 0.8 mg/kg succinylcholine | 60 |
| K | 1 | Relaxation time after 1.0 mg/kg succinylcholine | 12, 17a |

aTwo anesthesias of the same patient.

1. Population description: Adult surgical patients undergoing rapid sequence induction

Tested variants: A, K

Reference: 6

| Genotype | n | Measurement | Mean (min) |
| --- | --- | --- | --- |
| No Variants Detected | 35 | Time to 90% recovery of the first twitch in train-of-four after 1 mg/kg succinylcholine | 9.5 |
| K | 14 | Time to 90% recovery of the first twitch in train-of-four after 1 mg/kg succinylcholine | 11.6 |
| KK | 3 | Time to 90% recovery of the first twitch in train-of-four after 1 mg/kg succinylcholine | 11.5 (median) |
| A | 1 | Time to 90% recovery of the first twitch in train-of-four after 1 mg/kg succinylcholine | 14.5 |

**References**

1. Bartels CF, Jensen FS, Lockridge O, et al. DNA mutation associated with the human butyrylcholinesterase K-variant and its linkage to the atypical variant mutation and other polymorphic sites. *Am J Hum Genet.* 1992;50(5):1086-1103.

2. Jensen FS, Skovgaard LT, Viby-Mogensen J. Identification of human plasma cholinesterase variants in 6,688 individuals using biochemical analysis. *Acta Anaesthesiol Scand.* 1995;39(2):157-162.

3. Cerf C, Mesguish M, Gabriel I, Amselem S, Duvaldestin P. Screening patients with prolonged neuromuscular blockade after succinylcholine and mivacurium. *Anesth Analg.* 2002;94(2):461-466, table of contents.

4. Yen T, Nightingale BN, Burns JC, Sullivan DR, Stewart PM. Butyrylcholinesterase (BCHE) genotyping for post-succinylcholine apnea in an Australian population. *Clin Chem.* 2003;49(8):1297-1308.

5. Gatke MR, Viby-Mogensen J, Ostergaard D, Bundgaard JR. Response to mivacurium in patients carrying the k variant in the butyrylcholinesterase gene. *Anesthesiology.* 2005;102(3):503-508.

6. Bretlau C, Sorensen MK, Vedersoe AL, Rasmussen LS, Gatke MR. Response to succinylcholine in patients carrying the K-variant of the butyrylcholinesterase gene. *Anesth Analg.* 2013;116(3):596-601.

7. Sanchez LH, Medina OM, Gomez G, Gonzalez CI, Florez-Vargas O. Laboratory genetic-based reference values for cholinesterase activity in a Colombian population: A step forward in personalized diagnostics. *Biomedica.* 2015;35 Spec:20-29.

8. Jensen FS, Viby-Mogensen J. Plasma cholinesterase and abnormal reaction to succinylcholine: twenty years' experience with the Danish Cholinesterase Research Unit. *Acta Anaesthesiol Scand.* 1995;39(2):150-156.

9. Levano S, Ginz H, Siegemund M, et al. Genotyping the butyrylcholinesterase in patients with prolonged neuromuscular block after succinylcholine. *Anesthesiology.* 2005;102(3):531-535.
